# Supplementary material
Source: PubMed Central journal article supplement (PMC7647669)
Supplement: mmc1.pdf [file mmc1.pdf]

**YMTHE, Volume 28**

## **Supplemental Information**

**lncRNA ZNF649-AS1 Induces**

**Trastuzumab Resistance by Promoting**

**ATG5 Expression and Autophagy**

**Mingli Han, Xueke Qian, Hui Cao, Fang Wang, Xiangke Li, Na Han, Xue Yang, Yunqing Yang, Dongwei Dou, Jianguo Hu, Wei Wang, Jing Han, Fan Zhang, and Huaying Dong**

Supplemental Figures

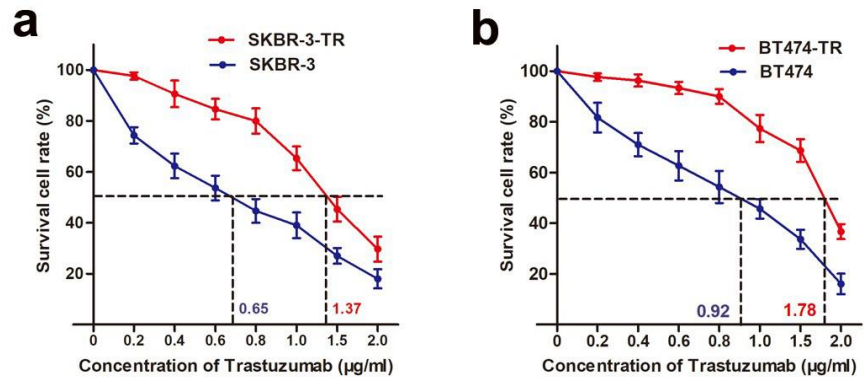

**Supplementary Figure S1** (a-b) The IC50 values of breast cancer parental cells (SKBR-3 and BT474) and established trastuzumab-resistant cells (SKBR-3-TR and BT474-TR) were determined via CCK8 assay.

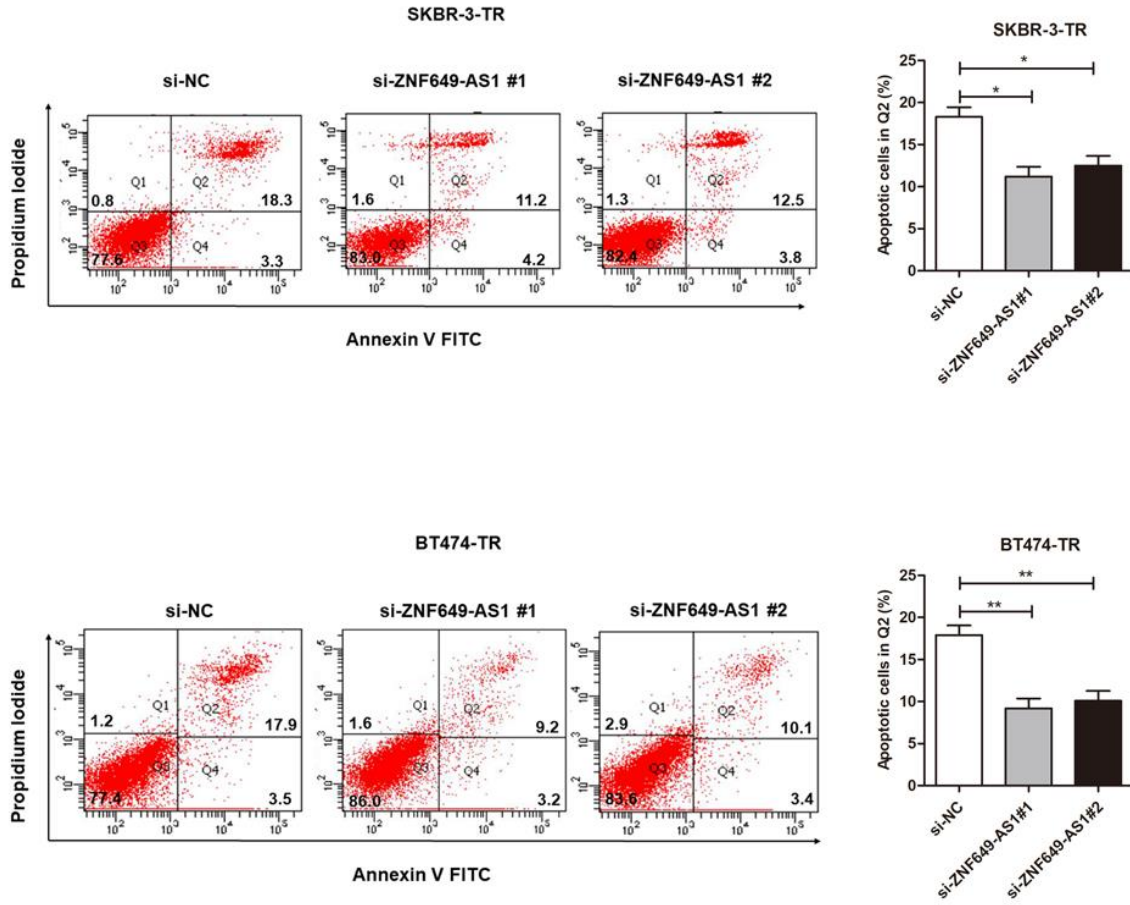

**Supplementary Figure S2** Flow cytometry analysis showed that knockdown of ZNF649-AS1 significantly suppressed apoptosis of SKBR-3-TR and BT474-TR cells. \*,  $P < 0.05$ ; \*\*,  $P < 0.01$ .

## Supplemental Tables

**Table S1.** Information of the qPCR primer sequences and silencing RNA sequences

---

| <b>qPCR primer name</b> | <b>Sequence (5'-3')</b>                                        |
|-------------------------|----------------------------------------------------------------|
| ZNF649-AS1 (Forward)    | TGACTACCTTGTCTGAGAAA                                           |
| ZNF649-AS1 (Reverse)    | CCAGATTCCTGTATGTCCATT                                          |
| ATG5 (Forward)          | TTCTCAAATATACTGTTTC                                            |
| ATG5 (Reverse)          | TATTATGTATCACAAATGG                                            |
| PTBP1 (Forward)         | ACCAGGCCTTCATCGAGAT                                            |
| PTBP1 (Reverse)         | GTTGGGAGAGCTGTCGGTCTT                                          |
| GAPDH (Forward)         | GCACCGTCAAGGCTGAGAAC                                           |
| GAPDH (Reverse)         | ATGGTGGTGAAGACGCCAGT                                           |
| U6 (Forward)            | GGAACGATACAGAGAAGATTAGC                                        |
| U6 (Reverse)            | TGGAACGCTTCACGAATTTGCG                                         |
| U1 (Forward)            | GGGAGATACCATGATCACGAAGGT                                       |
| U1 (Reverse)            | CCACAAATTATGCAGTCGAGTTTCCC                                     |
| <br>                    |                                                                |
| <b>ChIP qPCR primer</b> | <b>Sequence (5'-3')</b>                                        |
| ZNF649-AS1 promoter-F   | TGTTCATACCAAATAAGGG                                            |
| ZNF649-AS1 promoter-R   | AGTGTCATTAATAAATAAG                                            |
| <br>                    |                                                                |
| <b>RIP qPCR primer</b>  | <b>Sequence (5'-3')</b>                                        |
| ZNF649-AS1 Forward      | AGTACCTCTAATGTAAGATG                                           |
| ZNF649-AS1 Reverse      | AACTCACCACGATTGACAAC                                           |
| <br>                    |                                                                |
| <b>si-RNA name</b>      | <b>Sequence (5'-3')</b>                                        |
| si-ZNF649-AS1#1         | CGACCAACTGACTTTGAACCT                                          |
| si-ZNF649-AS1#2         | AGACAGAAGTGTAACGTTTCTC                                         |
| si-PTBP1                | CTCTTCGGCACCCCTCGAGTGAC                                        |
| si-ATG5                 | AAGATGTGCTTCGAGATGTGTGG                                        |
| Negative control        | UUCUCCGAACGUGUCACGUTT                                          |
| <br>                    |                                                                |
| <b>shRNA name</b>       | <b>Sequence (5'-3')</b>                                        |
| ZNF649-AS1 shRNA        | CCGGAGCGGTCTCAGCCGAATGACTCTCGAGAGTCA<br>TTCGGCTGAGACCGCTTTTTTG |
| Scrambled control       | CCGGTTTCTCCGAACGTGTACGTCTCGAGA<br>CGTGACACGTTCCGAGAATTTTTG     |

---

**Table S2.** Candidate lncRNAs selected on a basis of the Hiseq analysis

| LncRNAs    | Location    | Regulation (Res vs Par) | Fold change | <i>P</i> value |
|------------|-------------|-------------------------|-------------|----------------|
| ZNF649-AS1 | Chr19q13.41 | Up                      | 58.3681     | 0.00002486     |
| LINC02474  | Chr1q41.2   | Up                      | 35.6529     | 0.00008746     |
| AL590483.1 | Chr1q11.1   | Up                      | 29.1744     | 0.00022134     |
| AC010789.1 | Chr10q11.21 | Down                    | 45.9873     | 0.00005691     |
| FOXD3-AS1  | ChrXp22.33  | Down                    | 24.8693     | 0.00050972     |

Res: SKBR-3-TR cells; Par: SKBR-3 parental cells.

**Table S3.** The multivariate analysis and univariate analysis for clinical and biological characteristics of overall survival and progression-free survival in breast cancer patients

| Parameters                                   | OS                                    |                                      |                | PFS                                   |                                      |                |
|----------------------------------------------|---------------------------------------|--------------------------------------|----------------|---------------------------------------|--------------------------------------|----------------|
|                                              | Univariate analysis<br><i>p</i> value | Multivariate analysis<br>OR (95% CI) | <i>p</i> value | Univariate analysis<br><i>p</i> value | Multivariate analysis<br>OR (95% CI) | <i>p</i> value |
| ZNF649-AS1 expression<br>(high vs. low)      | 0.005                                 | 3.634 (1.023–12.912)                 | 0.046          | 0.001                                 | 3.018 (1.275-7.143)                  | 0.012          |
| Age (years)<br>(> 60 vs. ≤ 60)               | 0.518                                 |                                      |                | 0.998                                 |                                      |                |
| Gender<br>(male vs. female)                  | 0.180                                 |                                      |                | 0.661                                 |                                      |                |
| TNM stage<br>(III/IV vs. I/II)               | 0.003                                 | 4.398 (1.305–10.357)                 | 0.011          | 0.001                                 | 3.548 (1.192–8.320)                  | 0.005          |
| Lymphoma node<br>(involved vs. not involved) | 0.303                                 |                                      |                | 0.136                                 |                                      |                |

**Table S4: Identification of ZNF649-AS1 binding proteins by MS.**

| <b>Protein</b> | <b>Beads</b> | <b>ZNF649-AS1</b> | <b>Ratio (ZNF649-AS1/Beads)</b> |
|----------------|--------------|-------------------|---------------------------------|
| PTBP1          | 0            | 3                 | NA                              |
| PTPN13         | 0            | 3                 | NA                              |
| IGF2BP1        | 0            | 3                 | NA                              |
| DPM1           | 1            | 3                 | 3                               |
| SMAD4          | 0            | 2                 | NA                              |
| SUZ12          | 1            | 3                 | 3                               |
| MEIS1          | 1            | 3                 | 3                               |
| GSTO1          | 0            | 2                 | NA                              |
| EWS-FLI1       | 1            | 3                 | 3                               |
| PCH2           | 1            | 3                 | 3                               |

MS: mass spectrometry;

Beads: spectral counts of proteins in beads only group;

ZNF649-AS1: spectral counts of proteins in ZNF649-AS1 group;

Ratio (ZNF649-AS1/Beads): spectral count ratio of proteins comparing ZNF649-AS1 group to beads only group;

NA: not available.
